# Supplementary material for: Detection of Neutralizing Antibodies against SARS-CoV-2 Post-Vaccination in Health Care Workers of a Large Tertiary Hospital in Spain by Using a Rapid Test LFIC and sVNT-ELISA
Source: Vaccines (Basel). 2022 Mar 25;10(4):510. doi: 10.3390/vaccines10040510 (PMC9032347; doi:10.3390/vaccines10040510)
Supplement: Supplementary file 1 [file vaccines-10-00510-s001.zip › vaccines-1597806-supplementary.pdf]

## VALIDATION REPORT

### OJABIO RAPID TEST

### Detection of Neutralizing Antibodies against SARS-CoV-2 (Covid-19)

## REPORT CONTENT

|                                                                             |    |
|-----------------------------------------------------------------------------|----|
| 1. OBJECT AND FIELD OF APPLICATION.....                                     | 3  |
| 2. APPLICABLE PROCEDURES AND DOCUMENTS .....                                | 3  |
| 3. TECHNICAL AND HUMAN RESOURCES .....                                      | 4  |
| 4. MATERIALS AND EQUIPMENT NEEDED.....                                      | 4  |
| 5. GENERAL DESCRIPTION OF THE KIT TO BE VALIDATED AND REFERENCE ELISA ..... | 5  |
| 6. SAMPLES USED IN THE STUDY.....                                           | 7  |
| 7. VALIDATION PROTOCOL.....                                                 | 8  |
| 7.1. Operating process .....                                                | 8  |
| 7.2. Validation parameters.....                                             | 8  |
| 8. VALIDATION RESULTS.....                                                  | 9  |
| 9. VALIDATION CONCLUSIONS .....                                             | 11 |

## 1. PURPOSE AND FIELD OF APPLICATION

The purpose of this report is to carry out the necessary tests to demonstrate the technical validity of the Rapid Test of Neutralization Antibodies (AcN) of SARS-CoV-2 of the commercial house of OJABIO (hereinafter Rapid Test AcN SARS-CoV-2 of OJABIO ), through its comparison with the reference method (NeutralISA SARS-CoV2, Euroimmun)

The OJABIO AcN SARS-CoV-2 Rapid Test is a qualitative serological test used for the detection of neutralizing antibodies against coronavirus in direct blood and / or serum samples.

Validation is performed by comparison with the results obtained through the reference method (NeutralISA SARS-CoV2, Euroimmun), with respect to the results obtained with the OJABIO AcN SARS-CoV-2 Rapid Test.

The necessary tests for the validation of the test are carried out by the Microbiology Service of the General University Hospital of Alicante. The Service is accredited according to the ISO 9001: 2015 standard (Certificate number ES117080-1)

Wenzhou OJA Biotechnology CO. LTD (China), authorized distributor of the OJABIO AcN SARS-CoV-2 Rapid Test in Spain, provides the Service with 6 kits for validation, on 06/01/2021.

**For the sensitivity and specificity results obtained after validation, it is considered that the OJABIO AcN SARS-CoV-2 Rapid Test is suitable for the qualitative detection of neutralizing antibodies against coronavirus under the conditions evaluated.**

The results of the validation are authorized by Dr. Juan Carlos Rodríguez Díaz, Head of the Microbiology Section of the General University Hospital of Alicante.

## 2. APPLICABLE PROCEDURES AND DOCUMENTS

For the validation of the kit, the following documents, among others, have been taken as a reference:

- Standard UNE-EN ISO 15189: 2013 Clinical Laboratories. General requirements for quality and competence.

- CEA-ENAC-20 Rev. 1 Specific Accreditation Criteria. Microbiological analysis, ENAC May / 2017.
- G-ENAC-20 Rev. 1 Guide for the selection and use of test kits by accredited laboratories, ENAC / 2017.
- Validation and analytical verification of microbiological methods, SEIMC 2013.
- Instructions for use and processing of the OJABIO AcN SARS-CoV-2 Rapid Test.
- Instructions for use and processing of the Euroimmun NeutralISA SARS-CoV2 assay.
- CE Declaration of Conformity OJABIO AcN SARS-CoV-2 Rapid Test, September / 2020.
- Approval of the Ethics Committee of the University of Alicante (Spain) (File UA-2021-05-07\_5, dated 05/24/2021).
- Approval of the Ethics Committee for Drug Research of the General University Hospital of Elche (Spain) (File PI 59/2021, dated 06/22/2021).
- Approval of the Ethical Committee for Research with Medicines of the Alicante Department of Health, Hospital General (Spain) (File PI2021-094, Ref .: 2021-0214, dated 06/30/2021).

### 3. TECHNICAL AND HUMAN RESOURCES

The Microbiology Service has an integrated quality management system, under ISO 9001: 2015 standards. This integrated system allows the service to be managed globally, including processes such as:

- Standardization of analytical processes, through the availability of standard work procedures (SOPs) for each of them.
- Traceability of processes.
- Management and control of equipment maintenance, verification and calibration activities.
- Planning of internal and external quality control activities.

### 4. MATERIALS AND EQUIPMENT NEEDED

- OJABIO SARS-CoV-2 AcN Rapid Test Kit
- Euroimmun SARS-CoV2 NeutralISA Kit

**Additional Materials and Equipment (not included in the Test Kit):**

- ELISA DS2® automated system
- Calibrated Pipettes and Pipette Tips
- 1.5mL eppendor tubes
- Distilled or deionized water
- Incubator for incubation at + 37 ° C

## 5. GENERAL DESCRIPTION OF THE KIT TO BE VALIDATED AND THE REFERENCE ELISA

### 5.1. OJABIO SARS - CoV - 2 Neutralization Antibody Rapid Test

OJABIO Rapid test Detection Kit for Neutralizing Antibodies against SARS-CoV-2 is a lateral flow immunoassay for the qualitative detection of neutralizing antibodies against SARS-CoV-2 in serum, plasma, venous or peripheral whole blood samples. It is intended to be used as a screening test, and helps to determine previous exposure to the virus, to verify the efficacy of vaccines against SARS-CoV-2, and for epidemiological purposes.

The OJABIO AcN SARS-CoV-2 Rapid Test is based on a lateral flow immunochromatography for the qualitative determination of neutralizing antibodies to SARS-CoV-2. Neutralizing antibodies are immunoglobulins that target the receptor binding domain (S-RBD) of the S protein or spike of the SARS-CoV-2 type coronavirus, they can be of the IgM, IgG and / or IgA isotype. Neutralizing antibodies are detected by the specific recognition of neutralizing antibodies by the recombinant S-RBD antigen of SARS-CoV-2. The T line of the SARS-CoV-2 neutralizing antibody test card was coated with the recombinant SARS-CoV-2 antigen S-RBD, and the C line was coated with multiple sheep anti-S-RBD antibodies.

By dispensing the sample and diluent into the indicated well, the sample migrates by capillary action through the cassette. If there are neutralizing antibodies to SARS-CoV-2, they will bind to the colloidal gold particles immobilized in the matrix prior to the reaction matrix, forming an analyte (AcN) -colloidal gold \* conjugate. Next, in the reaction matrix (line T) is the recombinant S-RBD antigen of SARS-CoV-2 fixed to the nitrocellulose membrane, if the AcN \* are present they will bind specifically to the antigen forming an antigen complex -antibody. The presence of these immune complexes will be revealed by the appearance of a reddish band.

The test contains an internal control (C band) that should exhibit a reddish band regardless of color development in the T band. Otherwise, the test result is invalid and the sample must be retested with another device.

#### **Interpretation of results:**

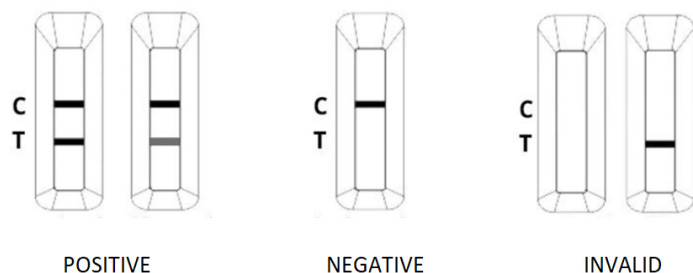

#### **5.2. Euroimmun NeutralISA SARS-CoV2 Assay**

The Euroimmun NeutralISA SARS-CoV2 Assay is an enzyme-linked immunosorbent assay (ELISA) for the semi-quantitative in vitro determination of neutralizing antibodies against SARS-CoV-2 for serum or plasma. The assay contains microplate strips with 8 reagent wells, coated with S1 / RBD domains of SARS-CoV-2 protein S. In the first step of the analysis, samples diluted with a buffer containing ACE2 are incubated in the reagent wells. If the sample contains neutralizing antibodies, they compete with the ACE2 receptor for the binding sites of the RBD / S1 protein. Unbound ACE2 is removed by a subsequent wash step. For the detection of bound ACE2, in a second step it is incubated with peroxidase-labeled streptavidin which, in a third step, catalyzes the colored reaction. The test was carried out partially by hand following the manufacturer's instructions. The photometric measurement was performed at a wavelength of 450 nm using the DS2® Automated ELISA System. The results are reported in the form of percent inhibition (% HI), by calculating a relationship between the extinction values of the controls or samples and the extinction value of the blank. Those values with a % HI  $\geq$  35 being positive and negative values with a % HI <20.

#### **Technical data:**

##### **Antigens**

Solid phase: S1 / RBD domain of SARS-CoV-2 protein S

Liquid phase: biotinylated human ACE2 receptor (angiotensin converting enzyme 2).

### Test evaluation

Semi-quantitative, the percentage of inhibition (% HI) is calculated. The intensity of the absorbance is inversely proportional to the concentration of neutralizing antibodies in the sample.

$\% HI = 100\% - (\text{sample absorbance} \times 100\% / \text{blank absorbance})$ .

Cut-off point at 25% HI (borderline 20-35% HI)

### Interpretation

% HI <20: negative

% HI  $\geq$  20 - <35: borderline

% HI  $\geq$  35: positive

### Sample dilution

Serum or plasma, 1: 5 in sample buffer previously prepared with ACE2.

**Test procedure:** 60 min (37 ° C) / 30 min (RT) / 15 min (RT) (sample / conjugate / substrate).  
Automatable.

**Kit format:** 96 divisible wells.

**Reference:** EI 2606-9601-4, SARS-CoV-2 Neutralisa CE

## 6. SAMPLES USED IN THE STUDY

For the validation, 78 serum samples were selected from 78 health workers from the Intensive Care Unit (ICU) of the General University Hospital of Elche vaccinated with the two doses of the Pfizer-BioNTech vaccine and who presented a serological result prior to vaccination negative for SARS-CoV2. The negative controls (for every two participants, a negative control was included), frozen plasma was selected, guarded by the Biobank of the General Hospital of Alicante - ISABIAL, from 39 subjects who have donated as healthy controls or with stage I oncological process without treatment oncology at the time of donation to the Biobank and that were collected in the 2015-2016 period prior to the pandemic.

## 7. VALIDATION PROTOCOL

### 7.1. Operating process

Validation is performed by comparison between the results obtained through the ELISA reference method, with respect to the results obtained with the OJABIO AcN SARS-CoV-2 Rapid Test.

For validation, all samples are processed by ELISA, and in parallel by the AcN SARS-CoV-2 Rapid Test from OJABIO. After completing the operational process, the results obtained are compared.

The ELISA methodology allows to quantify the concentration of neutralizing antibodies. For the equipment used in the validation, the cutoff values are indicated below:

| % Percentage Inhibition | Interpretation |
|-------------------------|----------------|
| <20                     | Negative       |
| 20-35                   | Indeterminate  |
| ≥35                     | Positive       |

### 7.2. Validation parameters

From the results obtained in the validation, the following validation parameters will be calculated:

- **Analytical sensitivity:** proportion of samples that contain the investigated analyte, and respond positively to the method. In general, it is the total fraction of the number of positive results assigned correctly with the method used.
- **Analytical specificity:** proportion of samples that do not contain the microorganism under investigation, and respond negatively to the method. It is the total fraction of the number of negative results assigned correctly with the method used. Analytical specificity refers to the ability of an assay to detect only the intended target, and that the quantification of the target should not be affected by cross-reactivity of other related or potentially interfering analytes.
- **Efficiency:** it is the total fraction of the number of results assigned correctly with the method used.

|                           |       | Method to validate<br>OJABIO AcN SARS-CoV-2 Rapid Test |       |                   |
|---------------------------|-------|--------------------------------------------------------|-------|-------------------|
|                           |       | (+)                                                    | (-)   | Total             |
| Reference Method<br>ELISA | (+)   | a                                                      | b     | a + b             |
|                           | (-)   | c                                                      | d     | d + d             |
|                           | Total | a + c                                                  | b + d | n = a + b + c + d |

The calculations to evaluate the validation data are performed as follows:

$$\text{Sensitivity} = \frac{\text{True Positives}}{(\text{True Positives} + \text{false Negatives})} \times 100 = \frac{a}{a + b} \times 100$$

$$\text{Specificity} = \frac{\text{True Negatives}}{(\text{True Negatives} + \text{false Positives})} \times 100 = \frac{d}{c + d} \times 100$$

$$\text{Efficiency} = \frac{\text{True Positives} + \text{True Negatives}}{(\text{total n}^{\circ} \text{ of samples})} \times 100 = \frac{a + d}{n \text{ total}} \times 100$$

Note: The evaluation of False Positives and False Negatives is not included in this validation study, since the number of samples used may not be sufficient to provide a robust calculation of these parameters.

## 8. VALIDATION RESULTS

Annex 1 shows the primary data obtained in the validation, which begins on 07/05/2021 and ends on 07/12/2021.

### Concordance evaluation

Analyzing all the results globally (117 results), the percentage of results that are concordant between the reference methods (ELISA) and the OJABIO AcN SARS-CoV-2 Rapid Test is calculated, as shown in the following table:

| Results               | Nº of Data (%) |
|-----------------------|----------------|
| <b>Concordance</b>    | 116 (99,15)    |
| <b>No Concordance</b> | 1 (0.85)       |
| <b>Total</b>          | 100            |

### Concordance evaluation

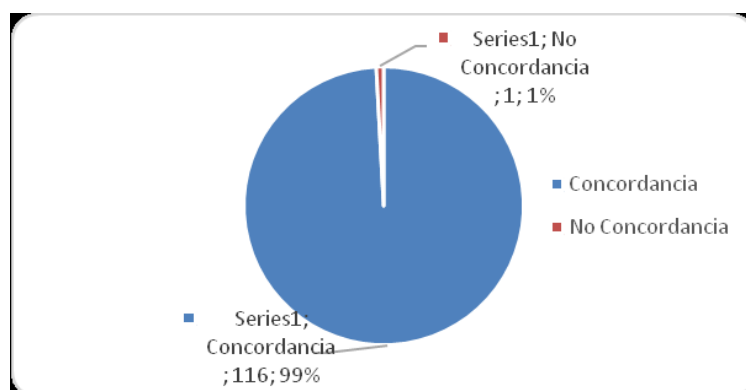

It is observed that **99%** of the results are concordant between the compared techniques.

The non-concordant results (1 of 117) correspond to a participant affected by severe Crohn's disease under treatment with anti-TNF $\alpha$ , which when processed by ELISA is Positive, and by the AcN SARS-CoV-2 Rapid Test of OJABIO is Negative.

### Sensitivity, Specificity and Overall Efficiency Assessment

The following tables indicate the number of results obtained, associated with each of the analytical processes carried out, depending on their positivity or negativity:

|                           |       | Method to validate<br>OJABIO AcN SARS-CoV-2 Rapid Test |     |       |
|---------------------------|-------|--------------------------------------------------------|-----|-------|
|                           |       | (+)                                                    | (-) | Total |
| Reference Method<br>ELISA | (+)   | 77                                                     | 1   | 78    |
|                           | (-)   | 0                                                      | 39  | 39    |
|                           | Total | 77                                                     | 40  | 117   |

Based on the data indicated in this second table, the validation parameters are calculated:

- SENSITIVITY = **98.72 %**
- SPECIFICITY = **100.00 %**
- EFFICIENCY = **99.15 %**

## 9. VALIDATION CONCLUSIONS

The **OJABIO SARS-CoV-2 Neutralizing Antibody Detection Kit** is suitable for detecting neutralizing antibodies in serum samples in patients vaccinated with the two doses of the Pfizer-BioNTech vaccine against the SARS-CoV-2 coronavirus. .

Sensitivity, Specificity and Efficiency results are considered satisfactory, standing at levels of approximately **99%** or higher.

The results in which there is no concordance between the compared techniques correspond to a participant with immunosuppressive treatment.

In no case have samples been obtained that have been negative by the reference methods (ELISA) and positive by the OJABIO AcN SARS-CoV-2 Rapid Test.

After the results of the sensitivity, specificity and efficiency obtained, the **OJABIO SARS-CoV-2 Neutralizing Antibody Detection Kit** is considered technically validated for the qualitative detection of neutralizing antibodies.

Responsible for Realization

Responsible for Realization

**Celia García**  
Resident  
General University Hospital of Alicante

**Dr. Mónica Parra**  
Head of Serology Section  
General University Hospital of Alicante

Responsible for Approval

Responsible for Approval

**Dr. Jose V. Tuells**  
Dpt. Preventive Medicine and Public Health  
University of Alicante

**Dr. Juan Carlos Rodríguez**  
Head of Microbiology Service  
General University Hospital of Alicante

**Annex 1.** Primary data validation of AcN SARS-CoV-2 Rapid Test from OJABIO

| Sample | Code      | Euroimmun NeutralISA SARS-CoV2 Assay | OJABIO AcN SARS-CoV-2 Rapid Test |
|--------|-----------|--------------------------------------|----------------------------------|
| 1      | UA02-0001 | 78.25                                | Positive                         |
| 2      | UA02-0002 | 96.93                                | Positive                         |
| 3      | UA02-0003 | 87.70                                | Positive                         |
| 4      | UA02-0004 | 94.38                                | Positive                         |
| 5      | UA02-0005 | 85.99                                | Positive                         |
| 6      | UA02-0006 | 91.32                                | Positive                         |
| 7      | UA02-0007 | 67.34                                | Positive                         |
| 8      | UA02-0008 | 99.89                                | Positive                         |
| 9      | UA02-0009 | 90.32                                | Positive                         |
| 10     | UA02-0010 | 99.28                                | Positive                         |
| 11     | UA02-0011 | 94.99                                | Positive                         |
| 12     | UA02-0012 | 72.41                                | Positive                         |
| 13     | UA02-0013 | 89.76                                | Positive                         |
| 14     | UA02-0014 | 95.38                                | Positive                         |
| 15     | UA02-0015 | 96.16                                | Positive                         |
| 16     | UA02-0016 | 95.94                                | Positive                         |
| 17     | UA02-0017 | 79.97                                | Positive                         |
| 18     | UA02-0018 | 88.87                                | Positive                         |
| 19     | UA02-0019 | 88.76                                | Positive                         |
| 20     | UA02-0020 | 70.57                                | Positive                         |
| 21     | UA02-0021 | 90.99                                | Positive                         |
| 22     | UA02-0022 | 89.65                                | Positive                         |
| 23     | UA02-0023 | 98.11                                | Positive                         |
| 24     | UA02-0024 | 77.80                                | Positive                         |
| 25     | UA02-0025 | 88.15                                | Positive                         |
| 26     | UA02-0026 | 86.04                                | Positive                         |
| 27     | UA02-0027 | 83.37                                | Positive                         |
| 28     | UA02-0028 | 98.61                                | Positive                         |
| 29     | UA02-0029 | 65.90                                | Positive                         |
| 30     | UA02-0030 | 71.74                                | Positive                         |
| 31     | UA02-0031 | 80.75                                | Positive                         |
| 32     | UA02-0032 | 72.07                                | Positive                         |
| 33     | UA02-0033 | 90.65                                | Positive                         |
| 34     | UA02-0034 | 86.82                                | Positive                         |
| 35     | UA02-0035 | 57.50                                | Positive                         |
| 36     | UA02-0036 | 58.89                                | Positive                         |
| 37     | UA02-0037 | 77.47                                | Positive                         |
| 38     | UA02-0038 | 98.11                                | Positive                         |

|    |             |       |          |
|----|-------------|-------|----------|
| 39 | UA02-0039   | 96.38 | Positive |
| 40 | UA02-0040   | 66.51 | Positive |
| 41 | UA02-0041   | 77.80 | Positive |
| 42 | UA02-0042   | 47.26 | Negative |
| 43 | UA02-0043   | 78.30 | Positive |
| 44 | UA02-0044   | 83.70 | Positive |
| 45 | UA02-0045   | 95.22 | Positive |
| 46 | UA02-0046   | 54.94 | Positive |
| 47 | UA02-0047   | 92.77 | Positive |
| 48 | UA02-0048   | 99.61 | Positive |
| 49 | UA02-0049   | 90.32 | Positive |
| 50 | UA02-0050   | 75.13 | Positive |
| 51 | UA02-0051   | 62.73 | Positive |
| 52 | UA02-0052   | 86.48 | Positive |
| 53 | UA02-0053   | 99.33 | Positive |
| 54 | UA02-0054   | 86.93 | Positive |
| 55 | UA02-0055   | 91.54 | Positive |
| 56 | UA02-0056   | 94.60 | Positive |
| 57 | UA02-0057   | 81.08 | Positive |
| 58 | UA02-0058   | 78.25 | Positive |
| 59 | UA02-0059   | 86.26 | Positive |
| 60 | UA02-0060   | 98.94 | Positive |
| 61 | UA02-0061   | 92.60 | Positive |
| 62 | UA02-0062   | 70.13 | Positive |
| 63 | UA02-0063   | 76.19 | Positive |
| 64 | UA02-0064   | 94.05 | Positive |
| 65 | UA02-0065   | 99.50 | Positive |
| 66 | UA02-0066   | 87.59 | Positive |
| 67 | UA02-0067   | 98.78 | Positive |
| 68 | UA02-0068   | 71.40 | Positive |
| 69 | UA02-0069   | 84.14 | Positive |
| 70 | UA02-0070   | 92.16 | Positive |
| 71 | UA02-0071   | 69.62 | Positive |
| 72 | UA02-0072   | 51.77 | Positive |
| 73 | UA02-0073   | 82.36 | Positive |
| 74 | UA02-0074   | 97.44 | Positive |
| 75 | UA02-0075   | 87.59 | Positive |
| 76 | UA02-0076   | 83.25 | Positive |
| 77 | UA02-0077   | 96.72 | Positive |
| 78 | UA02-0078   | 99.05 | Positive |
| 79 | 16sp0000112 | 0.00  | Negative |
| 80 | 15SP0000068 | 0.00  | Negative |
| 81 | 15SP0000070 | 0.00  | Negative |

|     |             |       |          |
|-----|-------------|-------|----------|
| 82  | 15SP0000071 | 1.13  | Negative |
| 83  | 15SP0000084 | 7.96  | Negative |
| 84  | 15SP0000085 | 0.33  | Negative |
| 85  | 15SP0000086 | 0.00  | Negative |
| 86  | 15SP0000087 | 0.00  | Negative |
| 87  | 15SP0000088 | 0.00  | Negative |
| 88  | 15SP0000110 | 0.00  | Negative |
| 89  | 15SP0000774 | 0.00  | Negative |
| 90  | 15SP0000786 | 3.72  | Negative |
| 91  | 15SP0000116 | 6.27  | Negative |
| 92  | 15SP0000124 | 1.27  | Negative |
| 93  | 15SP0000237 | 0.00  | Negative |
| 94  | 15SP0000288 | 2.17  | Negative |
| 95  | 15SP0000265 | 0.00  | Negative |
| 96  | 15SP0000371 | 0.00  | Negative |
| 97  | 15SP0000392 | 3.49  | Negative |
| 98  | 15SP0000403 | 5.33  | Negative |
| 99  | 15SP0000455 | 6.31  | Negative |
| 100 | 15SP0000004 | 3.06  | Negative |
| 101 | 15SP0000023 | 1.60  | Negative |
| 102 | 15SP0000056 | 0.90  | Negative |
| 103 | 15SP0000196 | 1.46  | Negative |
| 104 | 15SP0000310 | 4.24  | Negative |
| 105 | 15SP0000501 | 4.48  | Negative |
| 106 | 15SP0000528 | 9.38  | Negative |
| 107 | 15SP0000532 | 13.67 | Negative |
| 108 | 15SP0000556 | 8.53  | Negative |
| 109 | 15SP0000592 | 5.23  | Negative |
| 110 | 15SP0000606 | 6.46  | Negative |
| 112 | 15SP0000627 | 5.47  | Negative |
| 113 | 15SP0000682 | 5.66  | Negative |
| 114 | 15SP0000710 | 4.71  | Negative |
| 115 | 15SP0000716 | 11.59 | Negative |
| 116 | 15SP0000804 | 13.81 | Negative |
| 117 | 15SP0000824 | 12.11 | Negative |
| 118 | 15SP0000925 | 7.54  | Negative |
